# Supplementary material for: Plasma Ceramides and Sphingomyelins and Sudden Cardiac Death in the Cardiovascular Health Study
Source: PubMed Central journal article supplement (PMC10656644; doi:10.1001/jamanetworkopen.2023.43854), 2023-11-17
Supplement: jamanetwopen-e2343854-s001.pdf [file jamanetwopen-e2343854-s001.pdf]

## Supplementary Online Content

Bockus LB, Jensen PN, Fretts AM, et al. Plasma ceramides and sphingomyelins and sudden cardiac death in the Cardiovascular Health Study. *JAMA Netw Open*. 2023;6(11):e2343854. doi:10.1001/jamanetworkopen.2023.43854

**eTable 1.** Mean Baseline Characteristics and Trends Across Quartiles of Sphingolipids Among 4612 CHS (Cardiovascular Health Study) Participants

**eTable 2.** Sensitivity Analyses for Risk of Sudden Cardiac Death per SD Higher Log Sphingolipid Level Based on 215 Events Among 4612 Participants

**eTable 3.** Mutual Adjustment of Species With Palmitic Acid, Cer-16 and SM-16, in Addition to Model 3 Adjustment

**eTable 4.** Interactions With Age, Sex, Race, and BMI (Body Mass Index)

**eFigure.** Correlation Matrix Among the Sphingolipid Species of Interest

This supplementary material has been provided by the authors to give readers additional information about their work.

**eTable 1.** Mean Baseline Characteristics and Trends Across Quartiles of Sphingolipids Among 4612 CHS (Cardiovascular Health Study) Participants

|                                    | Mean (SD)  | Cer-16 |           | Cer-20 |          | Cer-22 |          | Cer-24 |          |
|------------------------------------|------------|--------|-----------|--------|----------|--------|----------|--------|----------|
|                                    |            | Trend  | Q1, Q4    | Trend  | Q1, Q4   | Trend  | Q1, Q4   | Trend  | Q1, Q4   |
| Age, years                         | 77 (5)     |        | 76, 77    |        | 77, 77   |        | 77, 76   |        | 77, 76   |
| Sex, % male                        | 41%        |        | 43, 38    |        | 48, 35   |        | 45, 39   |        | 40, 42   |
| Race, % black                      | 16%        |        | 18, 14    |        | 9, 21    |        | 14, 16   |        | 15, 15   |
| Education, years                   | 14 (5)     |        | 15, 14    |        | 15, 13   |        | 15, 13   |        | 14, 14   |
| Current smoker, %                  | 9%         |        | 7, 10     |        | 7, 11    |        | 7, 11    |        | 7, 11    |
| Current alcohol use, %             | 28%        |        | 33, 22    |        | 35, 20   |        | 35, 19   |        | 26, 27   |
| Body mass index, kg/m <sup>2</sup> | 27 (5)     |        | 27, 26    |        | 26, 27   |        | 25, 27   |        | 26, 27   |
| HDL*, mg/dL                        | 53 (14)    |        | 55, 51    |        | 55, 51   |        | 57, 49   |        | 56, 50   |
| Triglycerides*, mg/dL              | 144 (86)   |        | 120, 173  |        | 115, 176 |        | 109, 196 |        | 112, 191 |
| LDL*, mg/dL                        | 128 (34)   |        | 115, 138  |        | 116, 137 |        | 111, 139 |        | 112, 141 |
| C-reactive protein*, mg/L          | 2.6 (1.2)  |        | 2.3, 3.4  |        | 2.0, 3.5 |        | 1.9, 3.3 |        | 2.1, 3.0 |
| BNP*                               | 313 (712)  |        | 255, 395  |        | 326, 278 |        | 395, 235 |        | 383, 231 |
| Troponin T*                        | 9.0 (11.6) |        | 7.8, 11.2 |        | 9.5, 9.0 |        | 9.3, 8.7 |        | 9.5, 8.8 |
| Heart rate                         | 64 (12)    |        | 63, 67    |        | 63, 67   |        | 63, 66   |        | 63, 66   |
| QT-interval                        | 418 (37)   |        | 422, 412  |        | 422, 413 |        | 424, 413 |        | 422, 414 |
| QRS-interval                       | 94 (19)    |        | 94, 94    |        | 95, 94   |        | 95, 93   |        | 95, 93   |
| PR-interval                        | 174 (35)   |        | 176, 174  |        | 175, 170 |        | 177, 172 |        | 177, 171 |
| LV Hypertrophy                     | 6%         |        | 5, 7      |        | 4, 8     |        | 5, 7     |        | 6, 7     |
| Systolic BP, mmHg                  | 135 (21)   |        | 134, 136  |        | 133, 136 |        | 132, 136 |        | 133, 131 |
| Past smoker, %                     | 35 (56)    |        | 39, 28    |        | 41, 28   |        | 38, 33   |        | 34, 36   |
| Prevalent hypertension, %          | 69%        |        | 69, 70    |        | 65, 73   |        | 64, 71   |        | 66, 71   |
| Lipid lowering therapy, %          | 8%         |        | 11, 8     |        | 8, 10    |        | 9, 10    |        | 9, 9     |
| eGFR*                              | 73 (19)    |        | 76, 69    |        | 73, 73   |        | 74, 72   |        | 73, 72   |
| Self-reported good health          | 76%        |        | 79, 69    |        | 78, 71   |        | 76, 73   |        | 76, 74   |
| 2 or more IADLs                    | 9%         |        | 7, 13     |        | 6, 12    |        | 8, 9     |        | 9, 8     |
| Prevalent COPD, %                  | 31%        |        | 27, 35    |        | 30, 33   |        | 30, 33   |        | 29, 33   |
| Prevalent diabetes, %              | 13%        |        | 12, 16    |        | 11, 18   |        | 9, 21    |        | 10, 18   |
| Prevalent CVD, %                   | 30%        |        | 27, 34    |        | 27, 34   |        | 31, 30   |        | 31, 30   |
| Prevalent CHD, %                   | 24%        |        | 22, 27    |        | 23, 26   |        | 24, 24   |        | 24, 24   |
| Prevalent HF, %                    | 8%         |        | 7, 9      |        | 7, 9     |        | 10, 7    |        | 10, 7    |
| Prevalent Stroke, %                | 7%         |        | 5, 10     |        | 5, 8     |        | 7, 7     |        | 7, 7     |
| Prevalent AF, %                    | 9%         |        | 8, 10     |        | 11, 9    |        | 13, 7    |        | 13, 6    |
| Prevalent MI, %                    | 11%        |        | 10, 12    |        | 11, 12   |        | 12, 12   |        | 12, 12   |

  

|                                    | Mean (SD)  | SM-16 |          | SM-20 |           | SM-22 |           | SM-24 |           |
|------------------------------------|------------|-------|----------|-------|-----------|-------|-----------|-------|-----------|
|                                    |            | Trend | Q1, Q4   | Trend | Q1, Q4    | Trend | Q1, Q4    | Trend | Q1, Q4    |
| Age, years                         | 77 (5)     |       | 76, 77   |       | 78, 76    |       | 78, 75    |       | 78, 75    |
| Sex, % male                        | 41%        |       | 52, 31   |       | 57, 28    |       | 51, 29    |       | 44, 36    |
| Race, % black                      | 16%        |       | 8, 27    |       | 13, 20    |       | 11, 23    |       | 12, 22    |
| Education, years                   | 14 (5)     |       | 14, 13   |       | 14, 14    |       | 14, 13    |       | 14, 14    |
| Current smoker, %                  | 9%         |       | 8, 12    |       | 9, 10     |       | 8, 10     |       | 7, 11     |
| Current alcohol use, %             | 28%        |       | 30, 24   |       | 28, 26    |       | 32, 21    |       | 25, 27    |
| Body mass index, kg/m <sup>2</sup> | 27 (5)     |       | 27, 26   |       | 26, 27    |       | 26, 27    |       | 27, 26    |
| HDL*, mg/dL                        | 53 (14)    |       | 48, 59   |       | 50, 57    |       | 51, 56    |       | 51, 56    |
| Triglycerides*, mg/dL              | 144 (86)   |       | 162, 130 |       | 139, 147  |       | 134, 151  |       | 144, 145  |
| LDL*, mg/dL                        | 128 (34)   |       | 110, 143 |       | 107, 145  |       | 108, 145  |       | 111, 144  |
| C-reactive protein*, mg/L          | 2.6 (1.2)  |       | 2.5, 2.6 |       | 2.3, 2.9  |       | 2.1, 3.2  |       | 2.4, 2.8  |
| BNP*                               | 313 (712)  |       | 269, 361 |       | 479, 230  |       | 497, 214  |       | 440, 218  |
| Troponin T*                        | 9.0 (11.6) |       | 9.0, 9.2 |       | 11.8, 7.7 |       | 12.0, 7.4 |       | 10.9, 7.7 |
| Heart rate                         | 64 (12)    |       | 64, 66   |       | 64, 65    |       | 64, 65    |       | 64, 65    |
| QT-interval                        | 418 (37)   |       | 419, 415 |       | 420, 416  |       | 421, 416  |       | 420, 417  |
| QRS-interval                       | 94 (19)    |       | 95, 92   |       | 98, 92    |       | 97, 92    |       | 97, 92    |
| PR-interval                        | 174 (35)   |       | 178, 171 |       | 179, 171  |       | 180, 170  |       | 179, 172  |
| LV Hypertrophy                     | 6%         |       | 4, 7     |       | 5, 5      |       | 5, 6      |       | 6, 5      |
| Systolic BP, mmHg                  | 135 (21)   |       | 133, 137 |       | 134, 135  |       | 134, 136  |       | 134, 135  |
| Past smoker, %                     | 35 (56)    |       | 40, 29   |       | 36, 36    |       | 35, 34    |       | 31, 38    |
| Prevalent hypertension, %          | 69%        |       | 68, 72   |       | 71, 68    |       | 69, 69    |       | 71, 68    |
| Lipid lowering therapy, %          | 8%         |       | 12, 7    |       | 8, 8      |       | 9, 9      |       | 10, 8     |
| eGFR*                              | 73 (19)    |       | 71, 73   |       | 69, 76    |       | 69, 76    |       | 69, 76    |
| Self-reported good health          | 76%        |       | 78, 70   |       | 72, 77    |       | 72, 76    |       | 70, 78    |
| 2 or more IADLs                    | 9%         |       | 6, 12    |       | 10, 7     |       | 11, 8     |       | 11, 6     |
| Prevalent COPD, %                  | 31%        |       | 29, 35   |       | 34, 31    |       | 32, 30    |       | 29, 31    |
| Prevalent diabetes, %              | 13%        |       | 17, 10   |       | 15, 12    |       | 13, 14    |       | 14, 14    |
| Prevalent CVD, %                   | 30%        |       | 31, 30   |       | 37, 24    |       | 37, 26    |       | 36, 26    |
| Prevalent CHD, %                   | 24%        |       | 25, 23   |       | 29, 18    |       | 29, 20    |       | 28, 20    |
| Prevalent HF, %                    | 8%         |       | 9, 8     |       | 14, 5     |       | 13, 5     |       | 12, 5     |
| Prevalent Stroke, %                | 7%         |       | 5, 9     |       | 8, 6      |       | 8, 6      |       | 8, 6      |
| Prevalent AF, %                    | 9%         |       | 10, 8    |       | 15, 5     |       | 15, 5     |       | 13, 4     |
| Prevalent MI, %                    | 11%        |       | 12, 11   |       | 16, 8     |       | 14, 9     |       | 14, 9     |

An expansion of Figure 1 to complete the data for all measured ceramide and sphingomyelin species. AF indicates atrial fibrillation; BP, blood pressure; BNP, N-terminal pro-B-type natriuretic peptide; Cer-16,

ceramide with acylated palmitic acid; Cer-20, ceramide with arachidic acid; Cer-22, ceramide with behenic acid; Cer-24, ceramide with lignoceric acid; CHD, coronary heart disease; COPD, chronic obstructive pulmonary disease; CRP, C-reactive protein; CVD, cardiovascular disease; HDL, high-density lipoprotein; HF, heart failure; IADLs, instrumental activities of daily living; LDL, low-density lipoprotein; LV, left ventricle; MI, myocardial infarction; Q1, quartile 1 (the mean or percentage of each characteristic among participants with a sphingolipid level in the lowest 25% of the distribution); Q4, quartile 4 (highest 25%); SM-16, sphingomyelin with palmitic acid; SM-20, sphingomyelin with arachidic acid; SM-22, sphingomyelin with behenic acid; and SM-24, sphingomyelin with lignoceric acid. The colored graphics show means or percentages of each characteristic across quartiles of each of the sphingolipids. Unadjusted linear and logistic regression models were used to assess statistically significant ( $P < 0.0018$ ; 0.05/28 characteristics) associations of log-transformed sphingolipids with each characteristic; statistically significant positive trends are colored in blue, statistically significant negative trends are in red, grey indicates  $P > 0.0018$ .

**eTable 2.** Sensitivity Analyses for Risk of Sudden Cardiac Death per SD Higher Log Sphingolipid Level Based on 215 Events Among 4612 Participants

|               | Model 1 |        |      |         | Model 2 |        |      |         | Model 3 |        |      |       |
|---------------|---------|--------|------|---------|---------|--------|------|---------|---------|--------|------|-------|
|               | HR      | 95% CI |      | p       | HR      | 95% CI |      | p       | HR      | 95% CI |      | p     |
| <b>Cer-16</b> | 1.33    | 1.16   | 1.52 | < 0.001 | 1.28    | 1.11   | 1.47 | < 0.001 | 1.34    | 1.12   | 1.59 | 0.001 |
| <b>Cer-20</b> | 1.27    | 1.11   | 1.46 | < 0.001 | 1.19    | 1.04   | 1.36 | 0.011   | 1.06    | 0.90   | 1.24 | 0.476 |
| <b>Cer-22</b> | 1.18    | 1.03   | 1.35 | 0.014   | 1.10    | 0.96   | 1.27 | 0.174   | 0.92    | 0.77   | 1.10 | 0.360 |
| <b>Cer-24</b> | 1.15    | 1.01   | 1.32 | 0.040   | 1.09    | 0.95   | 1.25 | 0.235   | 0.92    | 0.77   | 1.09 | 0.319 |
| <b>SM-16</b>  | 1.17    | 1.01   | 1.35 | 0.032   | 1.25    | 1.05   | 1.48 | 0.012   | 1.37    | 1.12   | 1.67 | 0.002 |
| <b>SM-20</b>  | 0.94    | 0.82   | 1.08 | 0.367   | 0.94    | 0.81   | 1.09 | 0.377   | 0.83    | 0.71   | 0.98 | 0.031 |
| <b>SM-22</b>  | 1.00    | 0.87   | 1.15 | 0.996   | 0.98    | 0.85   | 1.15 | 0.839   | 0.84    | 0.70   | 1.00 | 0.054 |
| <b>SM-24</b>  | 0.98    | 0.85   | 1.13 | 0.769   | 0.99    | 0.85   | 1.15 | 0.886   | 0.86    | 0.72   | 1.03 | 0.104 |

  

|               | Model 4 |        |      |       | Model 5 |        |      |       | Model 6 |        |      |       |
|---------------|---------|--------|------|-------|---------|--------|------|-------|---------|--------|------|-------|
|               | HR      | 95% CI |      | p     | HR      | 95% CI |      | p     | HR      | 95% CI |      | p     |
| <b>Cer-16</b> | 1.27    | 1.06   | 1.51 | 0.008 | 1.32    | 1.11   | 1.58 | 0.002 | 1.17    | 0.97   | 1.40 | 0.097 |
| <b>Cer-20</b> | 1.09    | 0.93   | 1.28 | 0.284 | 1.06    | 0.90   | 1.24 | 0.513 | 1.15    | 0.98   | 1.36 | 0.087 |
| <b>Cer-22</b> | 0.96    | 0.81   | 1.14 | 0.627 | 0.93    | 0.78   | 1.11 | 0.436 | 1.01    | 0.85   | 1.21 | 0.895 |
| <b>Cer-24</b> | 0.96    | 0.81   | 1.14 | 0.629 | 0.93    | 0.79   | 1.11 | 0.435 | 1.01    | 0.85   | 1.21 | 0.901 |
| <b>SM-16</b>  | 1.30    | 1.07   | 1.58 | 0.009 | 1.35    | 1.10   | 1.65 | 0.004 | 1.19    | 0.98   | 1.46 | 0.083 |
| <b>SM-20</b>  | 0.88    | 0.74   | 1.03 | 0.121 | 0.85    | 0.72   | 1.00 | 0.054 | 0.91    | 0.77   | 1.07 | 0.245 |
| <b>SM-22</b>  | 0.89    | 0.75   | 1.06 | 0.181 | 0.85    | 0.71   | 1.02 | 0.079 | 0.93    | 0.78   | 1.11 | 0.425 |
| <b>SM-24</b>  | 0.90    | 0.76   | 1.07 | 0.244 | 0.88    | 0.74   | 1.05 | 0.162 | 0.93    | 0.78   | 1.11 | 0.435 |

Hazard ratios and 95% CIs are presented.

Model 1 includes adjustment for age, sex, race, and study site.

Model 2 includes model 1 adjustment terms and additional adjustment for body mass index (BMI), treated hypertension, HDL, LDL, smoking, and prevalent diabetes and CHD.

In model 3, in addition to model 2 adjustment terms, ceramide with palmitic acid (Cer-16) and sphingomyelin with palmitic acid (SM-16) were adjusted for ceramide with behenic acid (Cer-22) and sphingomyelin with behenic acid (SM-22), respectively; ceramide with arachidic acid (Cer-20), behenic acid (Cer-22), and lignoceric acid (Cer-24) and sphingomyelin with arachidic acid (SM-20), behenic acid (SM-22), and lignoceric acid (SM-24) were adjusted for Cer-16 and SM-16, respectively.

Each of models 4, 5, and 6 includes additional adjustment terms that are additive to model 3. Model 4 includes prevalence of COPD, heart failure, atrial fibrillation, and chronic kidney disease (by eGFR).

Model 5 includes heart rate, QT interval, and QRS interval.

Model 6 includes CRP (C-reactive protein), NT-proBNP, and troponin-T.

Cer-16 indicates ceramide with acylated palmitic acid; Cer-20, ceramide with arachidic acid; Cer-22, ceramide with behenic acid; Cer-24, ceramide with lignoceric acid; SM-16, sphingomyelin with palmitic acid; SM-20, sphingomyelin with arachidic acid; SM-22, sphingomyelin with behenic acid; and SM-24, sphingomyelin with lignoceric acid.

**eTable 3.** Mutual Adjustment of Species With Palmitic Acid, Cer-16 and SM-16, in Addition to Model 3 Adjustment

|               | Alone (Primary Analysis Model 3) |        |      | Adjusted for the other -16 species |      |        |      |       |
|---------------|----------------------------------|--------|------|------------------------------------|------|--------|------|-------|
|               | HR                               | 95% CI |      | p                                  | HR   | 95% CI |      | p     |
| <b>Cer-16</b> | 1.34                             | 1.12   | 1.59 | 0.001                              | 1.27 | 1.05   | 1.55 | 0.016 |
| <b>SM-16</b>  | 1.37                             | 1.12   | 1.67 | 0.002                              | 1.23 | 1.00   | 1.52 | 0.053 |

Cer-16 indicates ceramide with acylated palmitic acid; SM-16, sphingomyelin with palmitic acid.

**eTable 4.** Interactions With Age, Sex, Race, and BMI (Body Mass Index)

|               | Age  | Male | Black | BMI  |
|---------------|------|------|-------|------|
| <b>Cer-16</b> | 0.63 | 0.05 | 0.16  | 0.36 |
| <b>Cer-20</b> | 0.76 | 0.22 | 0.64  | 0.77 |
| <b>Cer-22</b> | 0.80 | 0.10 | 0.24  | 0.36 |
| <b>Cer-24</b> | 0.85 | 0.14 | 0.03  | 0.80 |
| <b>SM-16</b>  | 0.36 | 0.34 | 0.11  | 0.18 |
| <b>SM-20</b>  | 0.98 | 0.58 | 0.61  | 0.26 |
| <b>SM-22</b>  | 0.83 | 0.16 | 0.40  | 0.99 |
| <b>SM-24</b>  | 0.90 | 0.48 | 0.25  | 0.87 |

*P*-values for interaction terms displayed.

Cer-16 indicates ceramide with acylated palmitic acid; Cer-20, ceramide with arachidic acid; Cer-22, ceramide with behenic acid; Cer-24, ceramide with lignoceric acid; SM-16, sphingomyelin with palmitic acid; SM-20, sphingomyelin with arachidic acid; SM-22, sphingomyelin with behenic acid; and SM-24, sphingomyelin with lignoceric acid.

**eFigure.** Correlation Matrix Among the Sphingolipid Species of Interest

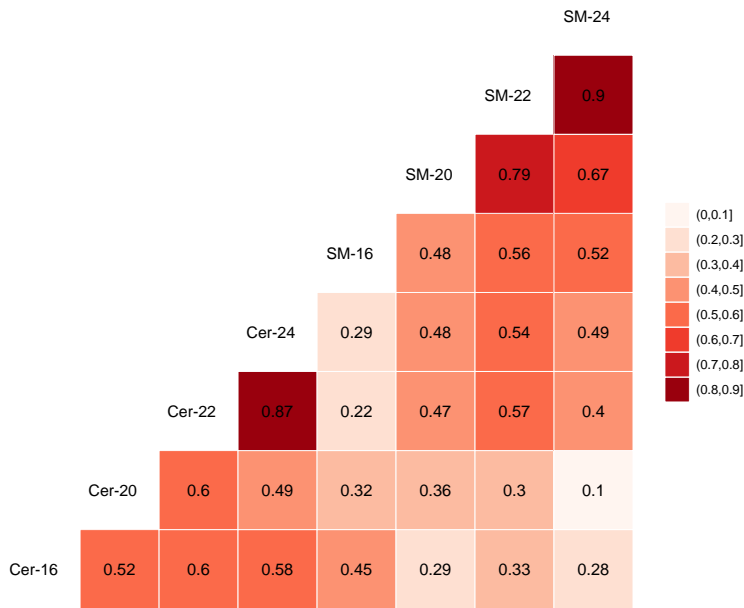

Cer-16 indicates ceramide with acylated palmitic acid; Cer-20, ceramide with arachidic acid; Cer-22, ceramide with behenic acid; Cer-24, ceramide with lignoceric acid; SM-16, sphingomyelin with palmitic acid; SM-20, sphingomyelin with arachidic acid; SM-22, sphingomyelin with behenic acid; and SM-24, sphingomyelin with lignoceric acid.
