# Supplementary material for: Plasma Ceramides and Sphingomyelins and Sudden Cardiac Death in the Cardiovascular Health Study
Source: PubMed Central journal article supplement (PMC10656644; doi:10.1001/jamanetworkopen.2023.43854), 2023-11-17
Supplement: jamanetwopen-e2343854-s002.pdf [file jamanetwopen-e2343854-s002.pdf]

## Data Sharing Statement

Bockus. Plasma Ceramides and Sphingomyelins and Sudden Cardiac Death in the Cardiovascular Health Study. *JAMA Netw Open*. Published November 17, 2023.  
doi:10.1001/jamanetworkopen.2023.43854

### Data

**Data available:** No

### Additional Information

**Explanation for why data not available:** The authors are not authorized to share data from the Cardiovascular Health Study (CHS). Information to request the use of CHS data can be found at <https://chs-nhlbi.org/>.
